# Supplementary material
Source: PubMed Central journal article supplement (PMC4282511)
Supplement: embj0033-2261-sd2.pdf [file embj0033-2261-sd2.pdf]

## Supplementary Information

### **The Janus transcription factor HapX controls fungal adaptation to both iron starvation and iron excess**

Fabio Gsaller<sup>1</sup>°, Peter Hortschansky<sup>2</sup>°, Sarah R. Beattie<sup>3</sup>, Veronika Klammer<sup>1</sup>, Katja Tuppatsch<sup>2</sup>, Beatrix E. Lechner<sup>1</sup>, Nicole Rietzschel<sup>4</sup>, Ernst R. Werner<sup>5</sup>, Aaron A. Vogan<sup>6</sup>, Dawoon Chung<sup>3</sup>, Ulrich Mühlenhoff<sup>4</sup>, Masashi Kato<sup>7</sup>, Robert A. Cramer<sup>3</sup>, Axel A. Brakhage<sup>2</sup>\* and Hubertus Haas<sup>1</sup>\*

<sup>1</sup>Division of Molecular Biology, Biocenter, Innsbruck Medical University, Austria; <sup>2</sup>Department of Molecular and Applied Microbiology, Leibniz Institute for Natural Product Research and Infection Biology (HKI), and Friedrich Schiller University Jena, Germany; <sup>3</sup>Department of Microbiology and Immunology, Geisel School of Medicine at Dartmouth Hanover, NH, USA; <sup>4</sup>Institut für Zytobiologie und Zytopathologie, Philipps-Universität Marburg, Germany; <sup>5</sup>Division of Biological Chemistry, Biocenter, Innsbruck Medical University, Austria; <sup>6</sup>Department of Biology, McMaster University, Hamilton, Canada; <sup>7</sup>Faculty of Agriculture, Meijo University, Nagoya, Japan.

\* To whom correspondence should be addressed.

|         |                           |                           |
|---------|---------------------------|---------------------------|
| E-mail: | hubertus.haas@i-med.ac.at | axel.brakhage@hki-jena.de |
| Tel.:   | +43/(0)512/9003-70205     | Tel.: +49/(0)3641-5321001 |
| Fax:    | +43/(0)512-9003-73100     | Fax: +49/(0)3641-5320802  |

° Authors contributed equally

**Key words:** iron, regulation, sensing, transcription factor complex, fungi, siderophores

**Table S1. Biomass production, TAFC production and PpIX accumulation of mutant strains.** Liquid cultures were grown under conditions of iron starvation (-Fe), iron sufficiency (+Fe, 0.03 mM FeSO<sub>4</sub>) and high iron availability (hFe, 3 mM FeSO<sub>4</sub>) at 37°C for 24 h. The data represent the mean ± SD from biological triplicates. Statistically significant differences compared to the wild type and *hapX<sup>R</sup>*, respectively, are shown in red (two-tailed, unpaired T-test; p<0.05).

**(A) Biomass production of  $\Delta cccA$  and  $\Delta hapX$ .** Compared strains are *A. fumigatus* ATCC 46645 derivatives.

| Strain        | Biomass production (g) |            |            |
|---------------|------------------------|------------|------------|
|               | -Fe                    | +Fe        | hFe        |
| wt            | 0.28±0.015             | 0.65±0.021 | 0.64±0.030 |
| $\Delta cccA$ | 0.28±0.016             | 0.64±0.021 | 0.42±0.026 |
| $\Delta hapX$ | 0.13±0.010             | 0.62±0.028 | 0.24±0.019 |

**(B) Biomass production, TAFC production and PpIX content of  $\Delta hapX$ ,  $\Delta hapX\Delta cccA$  and  $hapX^{VENUS}$ .** Compared strains are *A. fumigatus* AfS77 derivatives.

| Strain                   | Biomass production (g) |            |            | TAFC production (Abs <sub>435nm</sub> /biomass) | PpIX accumulation (pmol/mg protein) |
|--------------------------|------------------------|------------|------------|-------------------------------------------------|-------------------------------------|
|                          | -Fe                    | +Fe        | hFe        | -Fe                                             | -Fe                                 |
| wt                       | 0.19±0.014             | 0.59±0.019 | 0.59±0.026 | 0.44±0.028                                      | 2031.3±223.39                       |
| $\Delta hapX$            | 0.11±0.013             | 0.57±0.030 | 0.19±0.020 | 0.19±0.016                                      | 11278.5±1323.96                     |
| $\Delta hapX\Delta cccA$ | 0.12±0.010             | 0.56±0.019 | 0.18±0.014 | 0.16±0.020                                      | 10966.1±394.46                      |
| Strain                   | Biomass production (g) |            |            |                                                 |                                     |
|                          | -Fe                    | +Fe        | hFe        |                                                 |                                     |
| wt                       | 0.18±0.025             | 0.63±0.042 | 0.45±0.031 |                                                 |                                     |
| $\Delta hapX$            | 0.11±0.012             | 0.62±0.027 | 0.29±0.018 |                                                 |                                     |
| $hapX^{VENUS}$           | 0.19±0.024             | 0.61±0.015 | 0.47±0.034 |                                                 |                                     |

**(C) Biomass and TAFC production of strains harboring cysteine-mutations within the HapX protein.** Compared strains are *A. fumigatus* AfS77 derivatives.

| Strain           | Biomass production (g) |            |            | TAFC production (Abs <sub>435nm</sub> /biomass) |
|------------------|------------------------|------------|------------|-------------------------------------------------|
|                  | -Fe                    | +Fe        | hFe        | -Fe                                             |
| $\Delta hapX$    | 0.09±0.014             | 0.60±0.031 | 0.21±0.015 | 0.13±0.008                                      |
| $hapX^R$         | 0.20±0.019             | 0.61±0.040 | 0.61±0.042 | 0.50±0.036                                      |
| $hapX^{C115A}$   | 0.09±0.007             | 0.58±0.007 | 0.21±0.010 | 0.10±0.018                                      |
| $hapX^{C126A}$   | 0.17±0.019             | 0.56±0.020 | 0.61±0.029 | 0.43±0.040                                      |
| $hapXA2^{C203A}$ | 0.20±0.002             | 0.58±0.030 | 0.36±0.016 | 0.54±0.034                                      |
| $hapXB3^{C286A}$ | 0.20±0.016             | 0.59±0.036 | 0.29±0.013 | 0.50±0.026                                      |
| $hapXC3^{C353A}$ | 0.21±0.014             | 0.54±0.024 | 0.57±0.011 | 0.54±0.036                                      |
| $hapXD2^{C380A}$ | 0.20±0.018             | 0.57±0.028 | 0.63±0.024 | 0.55±0.015                                      |
| $hapX^{C422A}$   | 0.19±0.013             | 0.52±0.032 | 0.62±0.013 | 0.54±0.045                                      |

**(D) Biomass production, TAFC production and PpIX content of strains expressing C-terminal truncated HapX protein.** Compared strains are *A. fumigatus* AfS77 derivatives.

| Strain        | Biomass production (g) |            |            | TAFC production (Abs <sub>435nm</sub> /biomass) | PpIX accumulation (pmol/mg protein) |
|---------------|------------------------|------------|------------|-------------------------------------------------|-------------------------------------|
|               | -Fe                    | +Fe        | hFe        | -Fe                                             | -Fe                                 |
| wt            | 0.23±0.012             | 0.65±0.022 | 0.63±0.011 | 0.46±0.022                                      | 1122.3±120.56                       |
| $hapX^{464}$  | 0.13±0.005             | 0.65±0.037 | 0.65±0.011 | 0.16±0.018                                      | 8594.0±669.35                       |
| $hapX^{398}$  | 0.12±0.007             | 0.62±0.029 | 0.61±0.010 | 0.11±0.022                                      | 7763.1±424.41                       |
| $hapX^{374}$  | 0.11±0.001             | 0.66±0.032 | 0.64±0.013 | 0.09±0.016                                      | 7055.5±267.92                       |
| $hapX^{296}$  | 0.10±0.012             | 0.63±0.026 | 0.65±0.021 | 0.07±0.001                                      | 6761.4±228.61                       |
| $hapX^{158}$  | 0.15±0.009             | 0.59±0.031 | 0.18±0.002 | 0.14±0.005                                      | 5065.6±632.79                       |
| $\Delta hapX$ | 0.11±0.006             | 0.62±0.027 | 0.20±0.005 | 0.08±0.006                                      | 9831.9±735.56                       |

**Table S2. Proteases that are transcriptionally repressed by iron (Schrettl et al, 2008; Schrettl et al, 2010).**

| <b>Gene</b>  | <b>Protease</b>                              |
|--------------|----------------------------------------------|
| AFUA_2G01250 | serine peptidase, family S28, putative       |
| AFUA_3G05450 | glutamate carboxypeptidase, putative         |
| AFUA_3G11400 | aspartic endopeptidase Pep2                  |
| AFUA_5G03990 | aspartyl aminopeptidase                      |
| AFUA_5G04330 | aminopeptidase, putative                     |
| AFUA_5G07330 | carboxypeptidase S1, putative                |
| AFUA_5G09210 | alkaline serine protease Alp2                |
| AFUA_6G13540 | carboxypeptidase Y (CpyA), putative          |
| AFUA_5G13300 | aspartic endopeptidase Pep1                  |
| AFUA_8G00410 | methionine aminopeptidase, type II, putative |
| AFUA_8G04730 | oligopeptidase family protein                |

Table S3. Strains used in this study.

| Strain                                                                          | Genotype                                                                     | Reference                        |
|---------------------------------------------------------------------------------|------------------------------------------------------------------------------|----------------------------------|
| wt, ATCC 46645, clinical isolate                                                |                                                                              | American Type Culture Collection |
| $\Delta hapX$                                                                   | ATCC 46645, $\Delta hapX::ptrA$                                              | (Schrettl et al, 2010)           |
| $\Delta hapXcccA^{oe}$                                                          | ATCC 46645, $\Delta hapX::ptrA$ , $cccA^{oe}$ , $hph$                        | This study                       |
| $\Delta cccA$                                                                   | ATCC 46645, $\Delta cccA::ptrA$                                              | (Gsaller et al, 2012)            |
| $\Delta cccAcccA^{oe}$                                                          | ATCC 46645, $\Delta cccA::ptrA$ , $cccA^{oe}$ , $hph$                        | (Gsaller et al, 2012)            |
| $\Delta sreA$                                                                   | ATCC 46645, $\Delta sreA::hph$                                               | (Schrettl et al, 2008)           |
|                                                                                 |                                                                              |                                  |
| wt, AfS77                                                                       | ATCC 46645, $\Delta akuA::loxP$                                              | (Hartmann et al, 2010)           |
| $\Delta hapX$                                                                   | AfS77, $\Delta hapX::ptrA$                                                   | This study                       |
| $\Delta hapX\Delta cccA$                                                        | AfS77, $\Delta hapX::ptrA$ , $\Delta cccA::hph$                              | This study                       |
| <b>Amino acid substitution</b>                                                  |                                                                              |                                  |
| $hapX^R$                                                                        | AfS77, $\Delta hapX::ptrA$ , $hapX^{S16G}$ , $hph$                           | This study                       |
| $hapX^{C115A}$                                                                  | AfS77, $\Delta hapX::ptrA$ , $hapX^{C115A}$ , $hph$                          | This study                       |
| $hapX^{C126A}$                                                                  | AfS77, $\Delta hapX::ptrA$ , $hapX^{C126A}$ , $hph$                          | This study                       |
| $hapXA2^{C203A}$                                                                | AfS77, $\Delta hapX::ptrA$ , $hapX^{C203A}$ , $hph$                          | This study                       |
| $hapXA2^{C208A}$                                                                | AfS77, $\Delta hapX::ptrA$ , $hapX^{C208A}$ , $hph$                          | This study                       |
| $hapXBI^{C277A}$                                                                | AfS77, $\Delta hapX::ptrA$ , $hapX^{C277A}$ , $hph$                          | This study                       |
| $hapXBI^{C286A}$                                                                | AfS77, $\Delta hapX::ptrA$ , $hapX^{C286A}$ , $hph$                          | This study                       |
| $hapXC2^{C350A}$                                                                | AfS77, $\Delta hapX::ptrA$ , $hapX^{C350A}$ , $hph$                          | This study                       |
| $hapXC3^{C353A}$                                                                | AfS77, $\Delta hapX::ptrA$ , $hapX^{C353A}$ , $hph$                          | This study                       |
| $hapXD2^{C380A}$                                                                | AfS77, $\Delta hapX::ptrA$ , $hapX^{C380A}$ , $hph$                          | This study                       |
| $hapXD3^{C389A}$                                                                | AfS77, $\Delta hapX::ptrA$ , $hapX^{C389A}$ , $hph$                          | This study                       |
| $hapX^{C422A}$                                                                  | AfS77, $\Delta hapX::ptrA$ , $hapX^{C422A}$ , $hph$                          | This study                       |
| <b>Truncated HapX</b>                                                           |                                                                              |                                  |
| $hapX^{464}$                                                                    | AfS77, $\Delta hapX::ptrA$ , $hapX^{464}$ , $hph$                            | This study                       |
| $hapX^{398}$                                                                    | AfS77, $\Delta hapX::ptrA$ , $hapX^{398}$ , $hph$                            | This study                       |
| $hapX^{374}$                                                                    | AfS77, $\Delta hapX::ptrA$ , $hapX^{374}$ , $hph$                            | This study                       |
| $hapX^{296}$                                                                    | AfS77, $\Delta hapX::ptrA$ , $hapX^{296}$ , $hph$                            | This study                       |
| $hapX^{158}$                                                                    | AfS77, $\Delta hapX::ptrA$ , $hapX^{158}$ , $hph$                            | This study                       |
| <b>Venus tagged HapX</b>                                                        |                                                                              |                                  |
| $hapX^{VENUS}$                                                                  | AfS77, $\Delta hapX::ptrA$ , $hapX^{VENUS}$ , $hph$                          |                                  |
| <b>A. nidulans strains</b>                                                      |                                                                              |                                  |
| wt, BPU1                                                                        | <i>pyrG89; biA; wA3; argB2; pyroA4; pAR5 (argB); ArgB+</i>                   | (Tanaka et al, 2002)             |
| $\Delta hapX$ , BPU $\Delta$ X1                                                 | <i>pyrG89; biA; wA3; argB2; pyroA4; hapX<math>\Delta</math>::argB; ArgB+</i> | (Tanaka et al, 2002)             |
| <b>F. oxysporum strains</b>                                                     |                                                                              |                                  |
| wt, <i>Fusarium oxysporum</i> f sp <i>lycopersici</i> race 2 - 4287             |                                                                              | FGSC 9935                        |
| $\Delta hapX$ , <i>Fusarium oxysporum</i> f sp <i>lycopersici</i> race 2 - 4287 | $\Delta hapX::hph$                                                           | (Lopez-Berges et al, 2012)       |

**Table S4. Oligonucleotides (5'→3') used in this study.****(A) Disruption of *hapX* and *cccA* coding sequence.*****hapX* disruption**

|           |                             |
|-----------|-----------------------------|
| oAfhapX-1 | AGCGACTATAGCCGGATG          |
| oAfhapX-2 | CCTTGGGTCTTGAAGCTTGCG       |
| oAfhapX-3 | TCATCTAGACTGCCCAAGCTTCATACC |
| oAfhapX-4 | ATCAGAGCTGGAGAGGCA          |
| oAfhapX-5 | TGGAGTTCGGATTGGTGC          |
| oAfhapX-6 | ATCCCGCTTCTTTCACCC          |
| oAoPtrA1  | GAGGACCTGGACAAGTAC          |
| oAoPtrA2  | CATCGTGACCAGTGGTAC          |

***cccA* disruption**

|           |                           |
|-----------|---------------------------|
| oAfcccA1  | CAACTCGGGCTCTGGGTG        |
| oAfcccA5  | CGGTGTCCTTGGTATTGC        |
| oAfcccAr4 | TGGGGCCTGGTTAGCGTC        |
| oAfcccA3  | TTGTAAGCTTGATCGACCATGGTTC |
| oAfcccAr6 | AAGGATGCCGCCAATGTG        |
| oAfcccAr2 | GGGAGATCTCGCTGGCAC        |
| ohph14    | GAAGATGTTGGCGACCTC        |
| ohph15    | GAGAGCCTGACCTATTGC        |

**(B) Generation of *phapX<sup>R</sup>*-*hph*.**

|            |                                                     |
|------------|-----------------------------------------------------|
| oAfhapX-S1 | CGATACTTTGACCGACGGTTTGCCGACAAAGGAGCTGGTGCAGGCGCTG   |
| oAfhapX-S2 | CGCCAGCACATGGACAGCTAATTTATCGCATCTCTGCTTGTAGCATCACTC |
| oAfhapX-1  | AGCGACTATAGCCGGATG                                  |
| oAfhapX-S3 | CGACGGTTTGCCGACAAA                                  |
| oAfhapX-S4 | TTTATCGCATCTCTGCTTGTAG                              |
| oAfhapX-7  | CGCAAGCTTCAAGACCCAAGG                               |
| oAfhapX-8  | GGGTGAAAGAAGCGGGAT                                  |
| ohyg-1     | CCATTAACCTAGGTACAG                                  |
| ohyg-2     | CTCCACTCGACCTGCAGG                                  |

**(C) Site directed mutagenesis.**

|                 |                                          |
|-----------------|------------------------------------------|
| oAfHapX-C115A.f | TCGCGAGGTGGAGCAGGCGCGCTCCGAGATGACCTGGTG  |
| oAfHapX-C115A.r | ACCAGGTCATCTCGGAGCGCGCTGCCACCTCGCGAG     |
| oAfHapX-C126A.f | ACCTGGTGGCGCATCGTGCATGCGTTGGAGAAGGAG     |
| oAfHapX-C126A.r | TCCTTCTCCAACGCATGCGCAGATCGCGCCACCAGGTC   |
| oAfHapX-C203A.f | GTTAGGCTGCAATGATGCATCCACATCGCATTGCC      |
| oAfHapX-C203A.r | GGCAATGCGATGTGGATGCATCATTGCAGCCTAAC      |
| oAfHapX-C208A.f | ATTGCTCCACATCGCATGCGCAGTGCATTGAGGATGC    |
| oAfHapX-C208A.r | GCATCCTCAATGCACTGCGCATGCGATGTGGAGCAAT    |
| oAfHapX-C277A.f | CCTGCCGTGGATCCC GCCGGCTTCTGTTCCGATGGC    |
| oAfHapX-C277A.r | GCCATCCGAACAGAAGCCGGCGGGATCCACGGCAGG     |
| oAfHapX-C286A.f | TTCGGATGGCACGCCGGCCGTTTGC GCGGAGATG      |
| oAfHapX-C286A.r | CATCTCCGCGCAAACGGCCGCGTGCATCCGAAC        |
| oAfHapX-C350A.f | CAACGGGCCGGGCACAGCTGCGCAGTGTCTTGCAG      |
| oAfHapX-C350A.r | CTGCAAGACACTGCGCAGCTGTGCCCGGCCGTTG       |
| oAfHapX-C353A.f | CCGGGCACATGCGCGCAAGCGCTTGCAGATCCGCGGAGG  |
| oAfHapX-C353A.r | CCTCCGCGGATCTGCAAGCGCTTGC GCGCATGTGCCCGG |
| oAfHapX-C380A.f | CTGCCCGTCCGGATGCGCAGGAGGTAAGGCGCGG       |
| oAfHapX-C380A.r | CCGCGCCTTTACCTCCTGCGCATCCC GACGGGGCAG    |
| oAfHapX-C389A.f | AAGGCGCGGATGGCGGGGCATGCCAGTCCGCTAACAC    |
| oAfHapX-C389A.r | GTGTTACGCGACTGGCATGCCCCGCCATCCGCGCCTT    |
| oAfHapX-C422A.f | CATCCTTGACTTTATCTGCAGCCGACGCCTACACGAC    |
| oAfHapX-C422A.r | GTCGTGTAGGCGTCCGGCTGCAGATAAAGTCAAGGATG   |

**(D) Generation of truncated *hapX*.** (<sup>aa</sup>, amino acids in length of truncated HapX protein)

|             |                                     |                     |
|-------------|-------------------------------------|---------------------|
| hapXtrunc-f | GAATGCACAGGTACACTTG                 | HapX <sup>aa</sup>  |
| hapX464r    | TTAATTAATTCGAATCACCCACGATCGGTAAAGGG | HapX <sup>464</sup> |
| hapX398r    | TTAATTAATTCGAATCACGAAACATTGGTGTACGC | HapX <sup>398</sup> |
| hapX374r    | TTAATTAATTCGAATCAAGCGCTAGGGGAGCGGA  | HapX <sup>374</sup> |
| hapX296r    | TTAATTAATTCGAATCATTCTCTGAGCGGCCAT   | HapX <sup>296</sup> |
| hapX158r    | TTAATTAATTCGAATCATCTTACAGCCTCCCTGTC | HapX <sup>158</sup> |

**(E) Generation of Venus tagged HapX.** (overlapping complementary sequences are in same color)

|               |                                          |
|---------------|------------------------------------------|
| 5'hapX-f      | TGCCTAGTGAATGCTCCG                       |
| 5'hapXvenus-r | CTCGCCCTTGCTGACCATGGTTACGGATGATGAGACT    |
| 5'hapXvenus-f | AGTCTCATCATCCGTAACCATGGTCAGCAAGGGCGAG    |
| venus-r       | GTTAATGCAGCTGGCACG                       |
| venushapX-f   | TGTACAAGGGCGCCAGATCTATGTCTACACCTTCAATAGC |
| hapX3'-r      | ATATCACGAGTCCGTTTGG                      |
| 5'hapX-f2     | ACAACCTCTCCTATGAGTCG                     |
| venushapX-r   | GTAGACATAGATCTGGCGCCCTGTACAGCTCGTCCATG   |
| hapXtrunc-f   | GAATGCACAGGTACACTTG                      |
| hapX-r        | TTACTTAATTCGAATCATTGTGCGCAAACCGTCCG      |

**(F) Generation of DIG-labeled hybridization probes.**

|              |                      |             |
|--------------|----------------------|-------------|
| oAfccc1-1.f  | GATTCCGACACCCTAGAC   | <i>cccA</i> |
| oAfccc1-1.r  | GCGATGATGTTGTCCCTG   |             |
| hemA-FG1     | ATGACTAGTGGTGCACCTG  | <i>hemA</i> |
| hemA-FG2r    | CTAGGGTGATCTAGATGTTC |             |
| oAfLeu1-f    | GGTCTCACATACTTCGGC   | <i>leuA</i> |
| oAfLeu1-r    | TTCACGCACATCGGCAAG   |             |
| oAfhapX2-seq | TAATGTCCATCCAGATCGC  | <i>hapX</i> |
| oHapX-seq2   | CGAGTCCGTTTGGGTATC   |             |
| oAfmirB1me   | AAGCCGAGAAAAAGGGGG   | <i>mirB</i> |
| oAfmirB2me   | AACCCAGATGAAGCCAG    |             |
| oAfAT1me     | ACAATCAAGGCTCAGCCC   | <i>sidG</i> |
| oAfAT2me     | ACTTCGAGTCATGCTGGG   |             |
| oAfcytC1     | CCCTTCTTGACAGTGTCC   | <i>cycA</i> |
| oAfcytC2     | CCGCGCATCTGCTTTTAC   |             |

**(G) Surface plasmon resonance analysis** (CCAAT boxes are underlined).

|               |                                                       |
|---------------|-------------------------------------------------------|
| BcccAp-369-37 | Biotin-AAATCC <u>ACCAAT</u> CAACGCCTCCGTGATTGTGAGCAAT |
| cccAp-369-37  | ATTGCTGACAATCACGGAGGCGTTG <u>ATTGGTGGATTT</u>         |
| BcccAp-369-34 | Biotin-AAATCC <u>ACCAAT</u> CAACGCCTCCGTGATTGTGAGC    |
| cccAp-369-34  | GCTGACAATCACGGAGGCGTTG <u>ATTGGTGGATTT</u>            |
| BcccAp-369-32 | Biotin-AAATCC <u>ACCAAT</u> CAACGCCTCCGTGATTGTCA      |
| cccAp-369-32  | TGACAATCACGGAGGCGTTG <u>ATTGGTGGATTT</u>              |
| BcccAp-369-28 | Biotin-AAATCC <u>ACCAAT</u> CAACGCCTCCGTGATT          |
| cccAp-369-28  | AATCACGGAGGCGTTG <u>ATTGGTGGATTT</u>                  |

**(H) ChIP analysis of *cccA* and *actA*.**

|              |                                  |
|--------------|----------------------------------|
| cccA-ChIPf   | CCTCTAGACACTTATAAGGATTTACATTGTGT |
| cccA-ChIPrev | CGGATTATCATAACACAGACCACCAG       |
| actA-ChIPf   | TGTTGTGTAGGAGGGAGAGAAGT          |
| actA-ChIPrev | TTTCTTTTCTTGGACCAGTCGC           |

**(I) qRT-PCR analysis of *hapX*, *sreA* and *actA*.**

|            |                       |             |
|------------|-----------------------|-------------|
| actA-qPCRf | CCACGTCACCACTTTCAACTC | <i>actA</i> |
| actA-qPCRR | CTGCATACGGTCGGAGATAC  |             |
| hapX-qPCRf | GCCTACACGACCTCTCACG   | <i>hapX</i> |
| hapX-qPCRR | GCCCATCACACTCGCAGCC   |             |
| sreA-qPCRf | GGCAGTGCAGAAGAAGCGAAC | <i>sreA</i> |
| sreA-qPCRR | GGGGGAAGGATTGGCAGTTG  |             |

**CBC binding domain**

AnHapX MA--AQPALAIAPSAAPLAPALVAKPTVSPSPGPGTSGSVTSKEWVIPP RP KPGRK PATD 58  
AfuHapX ---MSTPSIAPAPAP--LVPALAAKPAISPSPGPGTSGSITSKEWVIPP RP KPGRK PATD 55  
AoryHapX -MATPAPSIAPAPTAPLAPALAAKPTISPSPGPGTSGSVTSKEWVIPP RP KPGRK PATD 59  
NfiHapX ---MSTPSIAPTAP--LVPALAAKPAISPSPGPGTSGSITSKEWVIPP RP KPGRK PATD 55  
AflaHapX -MATPAPSIAPAPTAPLAPALAAKPTISPSPGPGTSGSVTSKEWVIPP RP KPGRK PATD 59  
AnigHapX MATPAAPSLAPAPGPAPLAPALAAKPAISPSPGPGTSGSVTSKEWVIPP RP KPGRK PATD 60  
AclaHapX ---MSAPSMAPTAPASLAPALAAKPAVSPSPGPGTSGSITTSKEWVIPP RP KPGRK PATD 57  
. \*::\* :\* . \*.\*:.\*:\*\*\*\*\*:\*:\*\*\*:\*\*\*\*\*

**b (ZIP) Coiled coil 115**

AnHapX TPPTKRKAQNRAAQRAFRRRAARVSELEDQIKCIEDDHEIHVATFKEQIANLSREVEQC 118  
AfuHapX TPPTKRKAQNRAAQRAFRRRAARVNELEEQIKKIEDEHEIHIAAFKEQITNLSREVEQC 115  
AoryHapX TPPTKRKAQNRAAQRAFRRRAARVNELEDQIKKIEEHDIHVAAFKEQISNLSHEVEQC 119  
NfiHapX TPPTKRKAQNRAAQRAFRRRAARVNELEEQIKKIEDEHEIHIAAFKEQITNLSREVEQC 115  
AflaHapX TPPTKRKAQNRAAQRAFRRRAARVNELEDQIKKIEEHDIHVAAFKEQISNLSHEVEQC 119  
AnigHapX TPPTKRKAQNRAAQRAFRRRAARVNELEDQIKKIEDDHEIHVLQLKEQISNLSHEVEQC 120  
AclaHapX TPPTKRKAQNRAAQRAFRRRAARVNELEDQIKKIEDEHDIHIAAFKEQIGNLSCVEVEQC 117  
\*\*\*\*\*:\*\*\* \*\*::\*\* :\*\*\*\* \*\* \*\*\*\*\*

**126 158**

AnHapX RTEMGWWRDRCHALEKEVSVERAARETLVKELRSSLPEKNTSGTDAVPLP-----PRSSR 173  
AfuHapX RSEMTWWRDRCHALEKEVSVERSAKEAIVKEFRSSLSDRNAVSDKGLAPLTTSTPQARS 175  
AoryHapX RNEMTWWWRDRCHALEKEVSVERSAKEALVKEFRSSLSKKNAP---AGRAPLTRVSARNSG 176  
NfiHapX RSEMTWWRDRCHALEKEVSVERSAKEAIVKEFRSSLSDRNAASDKGLLPLATST-QNRS 174  
AflaHapX RNEMTWWWRDRCHALEKEVSVERSAKEALVKEFRSSLSKKNAP---AGRAPLTRVSARNSG 176  
AnigHapX RSEMAWWRDRCHALEKEVSVERSAKESLVKEFRSSLSKKNASRSKAPLTR---IPRDS 177  
AclaHapX RSEMTWWRDRCHTLEKEVSVERSAKEALVKEFRSLSDKNAASSDAVPFPRATSS----- 172  
\*. \*\* \*\*\*\*\*:\*\*\*\*\*:\*:\*\*\*:\*\*\* \*\*::\*\* :

**CRR-A**

AnHapX SSRMELEKSSPVDRRSELG-----EEVPLGNCNRCSTSHCQCIEDAF-GMPPIEMNRP 225  
AfuHapX SDRPDN--GDASNDSGEG-----REEVPLGCNDCSTSHCQCIEDAF-TMPGVVAQEQS 226  
AoryHapX SGRATNERSSPSNANSGSN---DDEQEVEPLGCPCSSSTHCQCIEDAF-AMPGVES-LHS 231  
NfiHapX SERPDN--GDASNDSGEG-----REEVPLGCNDCSTSHCQCIEDAF-TMPGVVAQEQS 225  
AflaHapX SGRATNERSSPSNANSGSN---DDEQEVEPLGCPCSSSTHCQCIEDAF-AMPGVES-LHS 231  
AnigHapX AAHAAVENN-----MHEER-----EEVPLGCNCSNVHCQCIEDAFSGMPGIERTSAQ 225  
AclaHapX --RPEND-GVPANNASHDDGHSDNREEVPLGCNDCSTSHCQCIEDAF-AMPGVLAQEE 228  
: . \*\*\*\*\* \*\* \*\*\*\*\* \*\* :

**CRR-B**

AnHapX -----EPKIKPEPEEMEIDFTTRFAAPHHEETAASPVASPPVDPCGFCQDGT 273  
AfuHapX RR-LDTTKPLGSEPEIKPDPEEMEIDFTSRFAATQ-QDQSPSTSVSSPAVDPCGFCSDGT 284  
AoryHapX KR-LSTTGQGRAEPEIKPDPEEMEIDFTTRFAAPQ-PQEDNATAVSSPAVDPCGFCQDGT 289  
NfiHapX RS-LDTTKPRSEPEIKPDPEEMEIDFTSRFAAIQ-QDHSPTSVSSPAVDPCGFCSDGT 283  
AflaHapX KR-LSTTGQGRAEPEIKPDPEEMEIDFTTRFAAPQ-PQEDNATAVSSPAVDPCGFCQDGT 289  
AnigHapX SKRPDSSQSHAPEPEIKPEPEEMEIDFTTRFAAPHVQDDTVTNVSSPAVDPCGFCQDGT 285  
AclaHapX RR-PGSTKPRLEPEIKPDPEEMEIDFTARFATMK-PQDHSPTSVSSPAVDPCGFCQDGT 286  
\*\*\*:\*\*\*:\*\*\*\*\*:\*\*\*: : : : \*:\*:\*\*\*\*\*.\*\*\*

**296**

AnHapX PCICAEMAAQEEERRNSTFESNRLAPIQNLISQFTPPPSDSDVRSNVTLPPIQATAAN 333  
AfuHapX PCICAEMAAQEQRRPRNSFENNRLAPIQNLISQFTPPPSDGDVRS-DVTLPPISQAT--N 341  
AoryHapX PCICAEMAAQEEQ--RRQSFENNRLAPIQNLISQFTPPPSDGDVRS-EVTLPSINQAT--N 344  
NfiHapX PCICAEMAAQEQRRPRNSFENNRLAPIQNLISQFTPPPSDGDVRS-EVTLPPISQAT--N 340  
AflaHapX PCICAEMAAQEEQ--RRQSFENNRLAPIQNLISQFTPPPSDGDVRS-EVTLPSINQAT--N 344  
AnigHapX PCICAEMAAQEEERRNSTFENNRLAPIQNLISQFTPPPSDGDVRS-EVTLPPISQAT--N 342  
AclaHapX PCICAEMAAQEEENERRNTFENNRLAPIQNLISQFTPPPSDGDVRS-EMTLPSLSQAT--N 343  
\*\*\*\*\*:\*: \*..\*\* \*\*\*\*\*:\*\*\*\*\*.\*\*\* :\*\*\*\*:\*\*\* \*

**CRR-C 374 CRR-D 398**

AnHapX PCANGPGTCAACLSDPRRTLFCCKTLAASRSASGTPSGCCGGKGRDGGCCQSQRSTSAPRR 393  
AfuHapX PCANGPGTCAQCLADPRRTLFCCKTLAASRSPSAAPSGCCGGKGRDGGCCQS--RNTNVS 399  
AoryHapX PCANGPGTCAQCLADPKSTLFCCKTLAASRSASVASSGCCGGKGRDGGCCQS--RSSNPPR 402  
NfiHapX PCANGPGTCAQCLADPRRTLFCCKTLAASRSPSAAPSGCCGGKGRDGGCCQS--RNTNVS 398  
AflaHapX PCANGPGTCAQCLADPKSTLFCCKTLAASRSASVASSGCCGGKGRDGGCCQS--RSSNPPR 402  
AnigHapX PCANGPGTCAQCLADPRRTLFCCKTLAASRPASAAPSGCCGGKGRDGGCCMS--RNSNPQR 400  
AclaHapX PCANGPGTCAQCLADPRSTLFCCKTLAASRSASGTPSGCCGGKGRDGGCCQS--RSSNPSR 401  
\*\*\*\*\* \*\*::\* :\*\*\*\*\*.\* :\*\*\*\*\* .\*\*\*\* \* \* : \*

```

                                422
AnHapX  -----SNTDRSATP-LTTLSCADAFTTLSRHPNFSRASDELASWLPKLHTLPNPRDVS 444
AfuHapX  GRSGSNNTSSGSSAAPSLTTLSCADAYTTLSRHPNFSRATDELSTWLPKLHTLPKPRDFP 459
AoryHapX  ---AAAAKSTSGRSTTPSLTTLSCADAFTTLSRHPNFSRASDEISTWLPKLHTLPNPKDVA 459
NfiHapX  GRSGSNNTSSGSSAAPSLTTLSCADAYTTLSRHPNFSRATDELSAWLPKLHTLPKPRDFP 458
AflaHapX  ---AAAAKSTSGRSTTPSLTTLSCADAFTTLSRHPNFSRASDEISTWLPKLHTLPNPKDVA 459
AnigHapX  -----SGSRRSATPSLTTLSCADAFTTLSRHPNFSRASDDISSWLPKLHTLPNPS-QS 451
AclaHapX  SGSTGNANSIPGPSTTPSLTTLSCADAFTTLSRHPSFTRATDDISNWLPKLHTLPNPRDIP 461
          : . *:* * *****:*****.*:*:*::: *****:* .

          464
AnHapX  QT---TPASRAAMEVEAASVMGVLRYFDRRFADK 475
AfuHapX  LTD--RVPRAALEVEAASVMGVLRYFDRRFADK 491
AoryHapX  SPD--RCSRAALEVEAASVMGVLRYFDRRFADK 491
NfiHapX  LND--RGVPRAAMEVEAASVMGVLRYFDRRFADK 490
AflaHapX  SPD--RCSRAALEVEAASVMGVLRYFDRRFADK 491
AnigHapX  QKEVMQPGSRAALEVEAASVMGVLRYFDRRFADK 485
AclaHapX  LSD--RGTBRAAMEVEAASVMGVLRYFDRRFADK 493
          .***:*****

```

**Figure S1. Alignment of *Aspergilli* HapX orthologs.** The three single Cys 115, 126 and 422 as well as CRR-A, -B, -C, -D are conserved in the seven HapX orthologs. An, *A. nidulans*; Afu, *A. fumigatus*; Aory, *Aspergillus oryzae*; Nfi, *Neosartorya fischeri*; Afla, *Aspergillus flavus*; Anig, *Aspergillus niger*; Acla, *Aspergillus clavatus*.





```

          CRR-D
AfuHapX SGCCGGKGDGGCCQSR-----NTNVSRRGRSG 403
AnHapX  SGCCGGKGRDGGCCQSQ-----SRTSAPRRSN 395
CaHap43 SSTRQISIRTNKTSIS-----IDSLNPNQSP 542
UmYap1  SPSRPGMSRSGTTGQLLPYPSRGETIPSAWRQIRSHPRFSQWGGDLLAEVVSKRSGN 631
      *      .      .      .

          422
AfuHapX SNNNTSSGS---SAAPSLTTLSCADAYTTLSRHPNFSRATDELSTWLPKLHTLP----KP 455
AnHapX  TDR-----SATP-LTTLSCADAFTTLSRHPNFSRASDELASWLPKLHTLP----NP 440
CaHap43 IPPPLLANN---KTGGSNAPTPTPAPSTPSHSSSVSSNSGIFIPCADAYKTLRHKKFNS 599
UmYap1  VHSPLLSSKRPREASVEIEPSRSNTISATSNDRATAKPLLHTTSDTTVHTVP-QIKTED 690
      .:      : : : : * .      :      .      :*: .      :

AfuHapX RDFPLTDRGVPRAALEVEEAASVMGVLRYFDRRFADK----- 491
AnHapX  RDVSQTTP-ASRAAMEVEEAASVMGVLRYFDRRFADK----- 475
CaHap43 VDFTTLVGKLTTRGMQVEVQSVANVLRRELDRRAYN----- 634
UmYap1  EDDGLDAREQKRRRILIDREAVQEALALLDAGTAAQPRAGASLSTNPGTGKEEQPCPCPW 750
      *      : : : * . * : *

AfuHapX -----
AnHapX  -----
CaHap43 -----
UmYap1  RPGERRTP 758

```

Figure S2. Alignment of *A. fumigatus*, *A. nidulans*, *C. albicans* HapX orthologs and *U. maydis* Yap1.

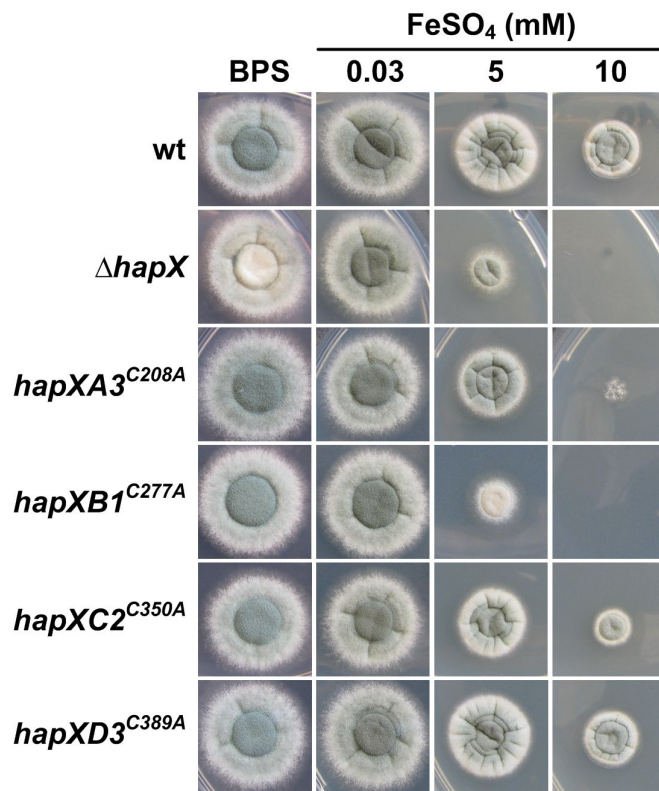

**Figure S3. Cysteine-to-alanine mutations within the same CRR cause an identical phenotype (compare to Fig. 4).** Strains were grown for 48h at 37°C on agar plates with the given iron concentration. Strains are derivatives of *A. fumigatus* AfS77.

| Species                              | Strand | Start | p-value  | Sites                           |
|--------------------------------------|--------|-------|----------|---------------------------------|
| <i>Trichophyton equinum</i>          | -      | 489   | 2.76e-14 | GCAGCCAATAGGCGGCCCTCTTATTGTAAGC |
| <i>Trichophyton tonsurans</i>        | -      | 491   | 2.76e-14 | GCAGCCAATAGGCGGCCCTCTTATTGTAAGC |
| <i>Trichophyton rubrum</i>           | -      | 481   | 2.76e-14 | GCAGCCAATAGGGGGCCCGCTTATTGTAAGC |
| <i>Trichophyton verrucosum</i>       | -      | 580   | 6.32e-14 | GCAGCCAATGGGGGGCCCGCTTATTGTAAGC |
| <i>Arthroderma benhamiae</i>         | -      | 582   | 7.40e-14 | GCAGCCAATGGGCTGCCCGCTTATTGTAAGC |
| <i>Paracoccidioides brasiliensis</i> | -      | 528   | 6.28e-13 | GCAGCCAATCAGCACCGCTGGGAATGTCAGC |
| <i>Arthroderma otae</i>              | -      | 455   | 7.14e-13 | GCAGCCAATAGGAGGGCAGATGATTGTAAGC |
| <i>Aspergillus flavus</i>            | -      | 370   | 1.04e-12 | CCGGCCAATCACATCTCCGTTAATAGTCAGC |
| <i>Aspergillus oryzae</i>            | -      | 369   | 1.04e-12 | CCGGCCAATCACATCTCCGTTAATAGTCAGC |
| <i>Paracoccidioides lutzii</i>       | -      | 523   | 3.77e-12 | GCAGCCAATCAGCACCGTTGGGAATGTAAGC |
| <i>Ajellomyces dermatitidis</i>      | -      | 369   | 3.77e-12 | CCAGCCAATCAGCACAGCGATAAATGTAAGT |
| <i>Aspergillus kawachii</i>          | -      | 317   | 3.77e-12 | CCGGCCAATCAAGCCCGCTAATGTCAGC    |
| <i>Arthroderma gypseum</i>           | -      | 486   | 1.08e-11 | CCAGCCAATAGAGGGTGCGCTGATTGTAATC |
| <i>Aspergillus niger</i>             | -      | 315   | 1.08e-11 | TGGGCCAATCACAAGCCCGCTAATGTCAGC  |
| <i>Penicillium chrysogenum</i>       | +      | 535   | 1.45e-11 | GCAGCCAATCACATCACAGGCAAAGGTCAGC |
| <i>Aspergillus terreus</i>           | -      | 307   | 2.12e-11 | CGAGCCAATCAGCATTGCGGTAATGGTCAGC |
| <i>Talaromyces marneffeii</i>        | -      | 441   | 3.07e-11 | TCAGCCAATGGGAGAAACTGTAATGTAATC  |
| <i>Uncinocarpus reesii</i>           | -      | 434   | 4.37e-11 | GCACCCAATCAAAGCAATGCTGATTGTAAGC |
| <i>Ajellomyces capsulatus</i>        | -      | 346   | 7.28e-11 | CCGGCCAATCAGCACGGCGGTAATGTAAGG  |
| <i>Neosartorya fischeri</i>          | -      | 532   | 1.09e-10 | TCCACCAATCAACGCATCTGTGATTGTCAGC |
| <i>Penicillium digitatum</i>         | +      | 609   | 1.18e-10 | GCAGCCAATCGCATCAGCTGCAAAGGTCATC |
| <i>Aspergillus fumigatus</i>         | -      | 365   | 1.49e-10 | TCCACCAATCAACGCCTCCGTGATTGTCAGC |
| <i>Coccidioides posadasii</i>        | -      | 415   | 2.17e-10 | CAGGCCAATAGCGTCACAGCAAATAGTAAGC |
| <i>Coccidioides immitis</i>          | -      | 417   | 2.17e-10 | CAGGCCAATAGCGTCACAGCAAATAGTAAGC |
| <i>Talaromyces stipitatus</i>        | -      | 467   | 2.89e-10 | TTAGCCAATGAAAACCGTTATAAATGTAAGC |
| <i>Fusarium oxysporum</i>            | -      | 281   | 3.11e-10 | CCAGCCAATCACGAAGCATGTTTTAGTAATC |
| <i>Aspergillus clavatus</i>          | -      | 382   | 3.11e-10 | CTGGCCAATCAGCGAGTGCATAAATGTCAGC |
| <i>Aspergillus nidulans</i>          | -      | 475   | 6.50e-08 | CGAGCCAATCAGAGCGAAGTGATTACCAACC |

**Figure S4. Identification of an evolutionary conserved motif in the *cccA* promoter regions of 28 fungal species.** Sites identified by MEME analysis and their relative positions to the ATG start codon of the *CccA* coding sequences are shown.

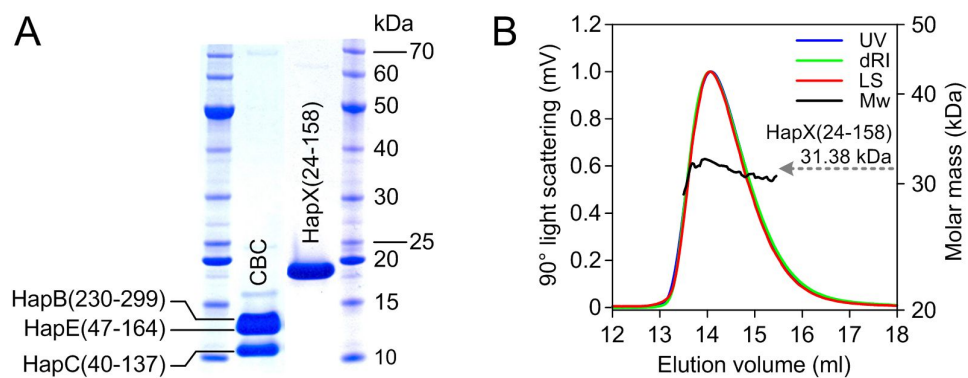

**Figure S5. Characterization of purified recombinant proteins used in this study.** (A) SDS-PAGE analysis of the CBC and HapX(24-158). (B) Analysis of the solution oligomeric state of HapX(24-158) by size exclusion chromatography and multiangle static light scattering. The light scattering signal (LS) is shown overlaid with the calculated molar mass (Mw) across the elution profile monitored by the absorbance at 280 nm (UV) and changes of the refractive index (dRI).

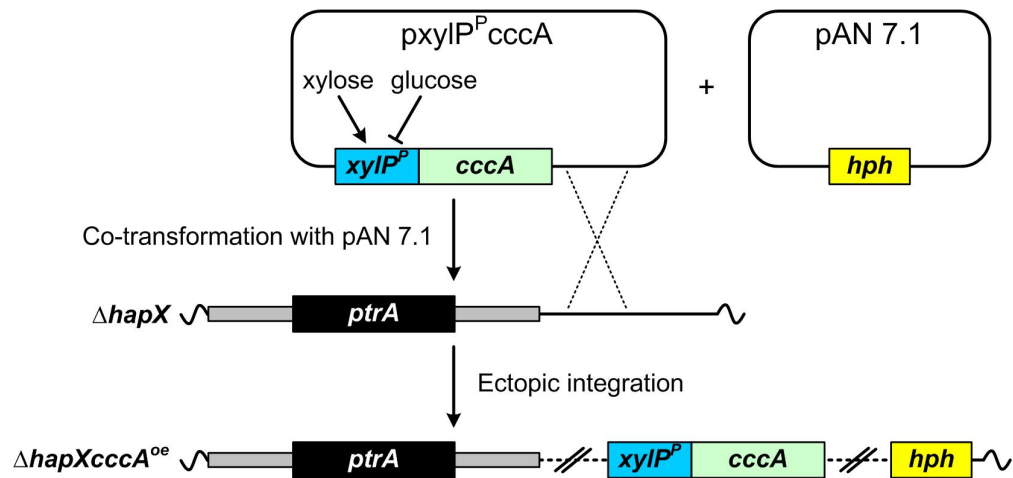

**Figure S6. Ectopic integration of inducible *cccA*.**  $p_{xyIP^P} cccA$  was co-transformed with  $pAN 7.1$ , a plasmid containing a hygromycin resistance cassette (*hph*) for selection of transformants.

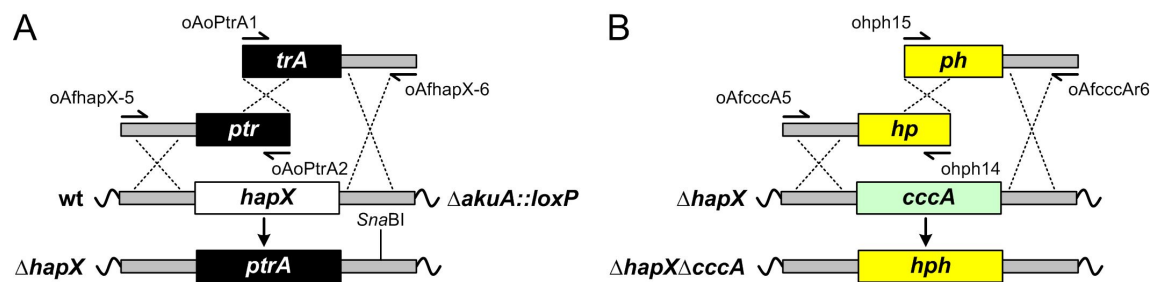

**Figure S7. Scheme of *hapX* (A) and *cccA* (B) disruption using the bipartite technique.**

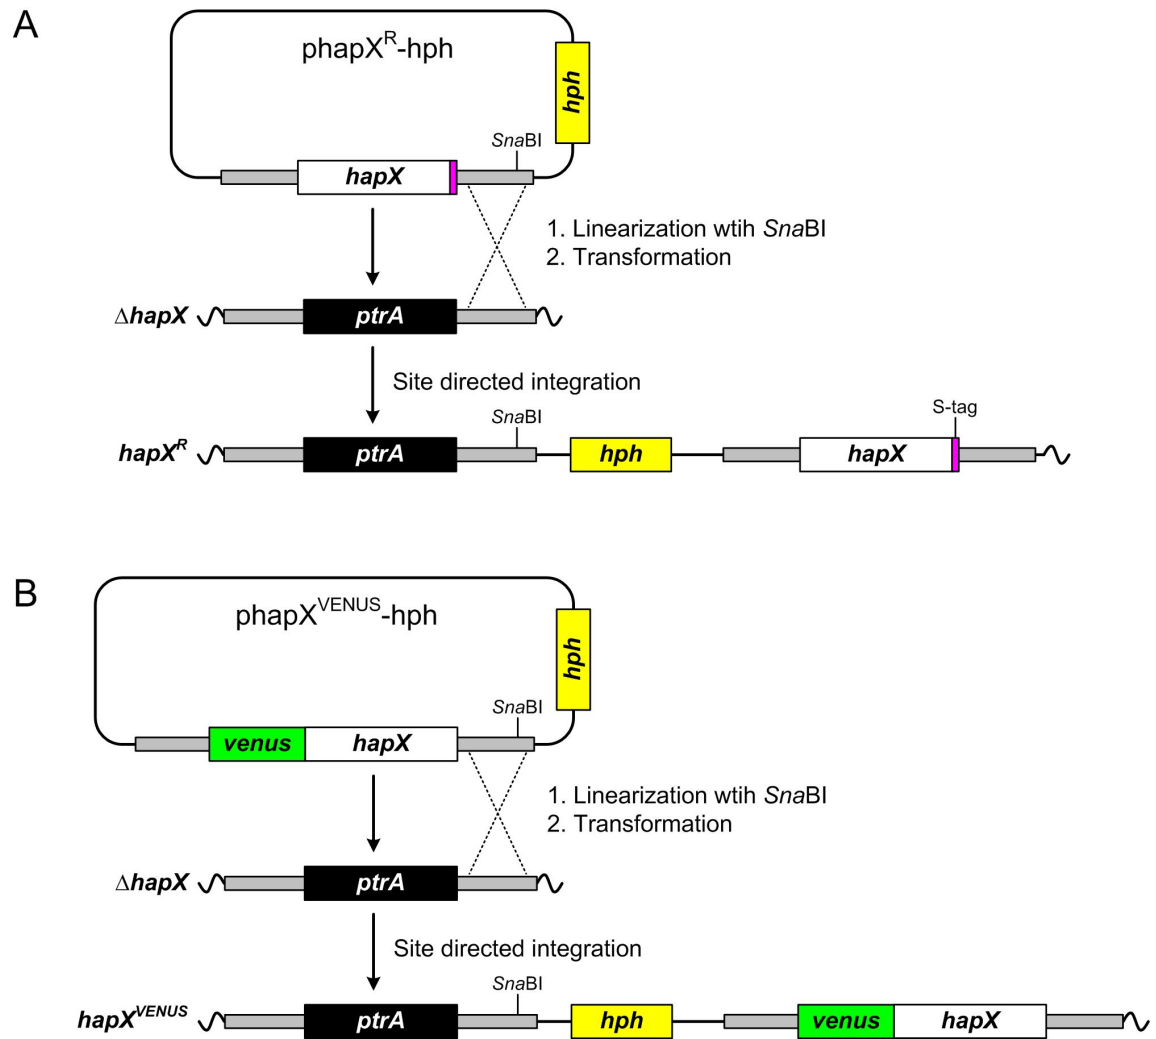

**Figure S8. Scheme of site-directed integration of *hapX* plasmids.** (A) Site-specific integration is illustrated for plasmid phapX<sup>R</sup>-hph, which was transformed into  $\Delta$ *hapX*. The same transformation strategy was performed with plasmids of modified *hapX* (mutations and truncations). (B) Site-directed integration of N-terminally *venus*-tagged *hapX*.
